# Supplementary material
Source: PubMed Central journal article supplement (PMC4696889)
Supplement: NIHMS734925-supplement-2.pdf [file NIHMS734925-supplement-2.pdf]

| Experiment                                                | Figures                                                                                                                 | Number of mice               | Mouse line               | Number of recordings | Baseline window duration | Evoked response window duration | Evoked response window onset (relative to stimulus onset) | Post-peak window duration | Post-peak window onset (relative to stimulus onset) | Stimulus                   | DP (mean ± SEM)                         | SP (mean ± SEM)                         |
|-----------------------------------------------------------|-------------------------------------------------------------------------------------------------------------------------|------------------------------|--------------------------|----------------------|--------------------------|---------------------------------|-----------------------------------------------------------|---------------------------|-----------------------------------------------------|----------------------------|-----------------------------------------|-----------------------------------------|
| Psychometric curve (1 vs 3 whiskers)                      | Fig. 1d                                                                                                                 | 3                            | C57BL/6NHsd              | n/a                  | n/a                      | n/a                             | n/a                                                       | n/a                       | n/a                                                 | 40 Hz (300-1200 deg/s)     | n/a                                     | n/a                                     |
| Psychometric curve (multi-whisker data point)             | Fig. 1d                                                                                                                 | 2                            | C57BL/6NHsd              | n/a                  | n/a                      | n/a                             | n/a                                                       | n/a                       | n/a                                                 | 40 Hz, 1.5 s (~2200 deg/s) | n/a                                     | n/a                                     |
| 2-photon calcium imaging of S1 somata                     | Fig. 1e-g, Fig. 7d, Supp. Fig. 1b,c, Supp. Fig. 8                                                                       | 6                            | C57BL/6NHsd              | 6 (1746 neurons)     | 267 ms (4 frames)        | 200 ms (3 frames)               | ~100 ms                                                   | n/a                       | n/a                                                 | 20 Hz (500-900 deg/s)      | 0.51 ± 0.002 (responsive: 0.56 ± 0.003) | 0.52 ± 0.002 (responsive: 0.57 ± 0.003) |
| TG                                                        | Fig. 2, Supp. Fig. 1b,c, Supp. Fig. 10                                                                                  | 6                            | C57BL/6NHsd              | 17                   | 200 ms                   | 27 ms                           | 2 ms                                                      | n/a                       | n/a                                                 | 40 Hz (700-900 deg/s)      | 0.52 ± 0.02                             | 0.94 ± 0.02                             |
| VPM                                                       | Fig. 3, Supp. Fig. 1b,c, Supp. Fig. 3, Supp. Fig. 6, Supp. Fig. 10                                                      | 4                            | C57BL/6NHsd              | 17                   | 200 ms                   | 10 ms                           | 5 ms                                                      | 100 ms                    | 15 ms                                               | 40 Hz (700-900 deg/s)      | 0.60 ± 0.03                             | 0.85 ± 0.03                             |
| VPM microstimulation & VPM recording                      | Fig. 4a-f                                                                                                               | 3                            | Scnn1a-Tg3-Cre;Ai32      | 12                   | 200 ms                   | 10 ms                           | 5 ms                                                      | 100 ms                    | 15 ms                                               | 40 Hz (700-900 deg/s)      | n/a                                     | n/a                                     |
| VPM microstimulation & S1 recording                       | Fig. 4g-m                                                                                                               | 3                            | Scnn1a-Tg3-Cre;Ai32      | 15                   | 200 ms                   | 30ms                            | 5 ms                                                      | 100 ms                    | 35 ms                                               | 40 Hz (700-900 deg/s)      | n/a                                     | n/a                                     |
| S1 whole cell                                             | Fig. 5, Fig. 7a-c, Supp. Fig. 1b,c, Supp. Fig. 5, Supp. Fig. 6, Supp. Fig. 7, Supp. Fig. 8, Supp. Fig. 9, Supp. Fig. 10 | 17 (14 used for AP analysis) | C57BL/6NHsd              | 22 (19 for APs)      | 200 ms (200 ms for APs)  | 100 ms (100 ms for APs)         | 5 ms Vm (7 ms for APs)                                    | n/a                       | n/a                                                 | 40 Hz (700-900 deg/s)      | 0.58 ± 0.03 Vm (0.54 ± 0.02 AP)         | 0.83 ± 0.03 Vm (0.62 ± 0.04 AP)         |
| 2-photon calcium imaging of S2-to-S1 axons                | Fig. 6, Supp. Fig. 1b,c                                                                                                 | 4                            | C57BL/6NHsd              | 4 (167 axons)        | 267 ms (8 frames)        | 167 ms (5 frames)               | ~117 ms                                                   | n/a                       | n/a                                                 | 20 Hz (500-900 deg/s)      | 0.53 ± 0.005                            | 0.54 ± 0.005                            |
| TG stimulus-response                                      | Supp. Fig. 1a                                                                                                           | 2                            | C57BL/6NHsd              | 9                    | 200 ms                   | 27 ms                           | 2 ms                                                      | n/a                       | n/a                                                 | 40 Hz (300-1200 deg/s)     | n/a                                     | n/a                                     |
| VPM stimulus-response                                     | Supp. Fig. 1a                                                                                                           | 2                            | C57BL/6NHsd              | 15                   | 200 ms                   | 10 ms                           | 5 ms                                                      | n/a                       | n/a                                                 | 40 Hz (300-1200 deg/s)     | n/a                                     | n/a                                     |
| S1 stimulus-response                                      | Supp. Fig. 1a                                                                                                           | 2                            | C57BL/6NHsd              | 16                   | 200 ms                   | 100 ms                          | 7 ms                                                      | n/a                       | n/a                                                 | 40 Hz (300-1200 deg/s)     | n/a                                     | n/a                                     |
| Performance with extended training                        | Supp. Fig. 1d                                                                                                           | 2                            | C57BL/6NHsd, TH-Cre;Ai32 | n/a                  | n/a                      | n/a                             | n/a                                                       | n/a                       | n/a                                                 | 40 Hz (700-900 deg/s)      | n/a                                     | n/a                                     |
| S1 optogenetic silencing                                  | Supp. Fig. 2a-j                                                                                                         | 2                            | PV-IRES-Cre;Ai32         | 23                   | n/a                      | 500ms                           | 5 ms                                                      | n/a                       | n/a                                                 | 40 Hz (700-900 deg/s)      | n/a                                     | n/a                                     |
| S1 muscimol silencing                                     | Supp. Fig. 2k,l                                                                                                         | 2                            | C57BL/6NHsd              | n/a                  | n/a                      | n/a                             | n/a                                                       | n/a                       | n/a                                                 | 40 Hz (700-900 deg/s)      | n/a                                     | n/a                                     |
| VPM microstimulation & S1 recording (awake, non-behaving) | Supp. Fig. 4                                                                                                            | 2                            | Scnn1a-Tg3-Cre;Ai32      | 21                   | 200 ms                   | 30ms                            | 5 ms                                                      | 100 ms                    | 35 ms                                               | 40 Hz (700-900 deg/s)      | n/a                                     | n/a                                     |

Supplementary Table 1. Summary of experimental conditions.
